# Supplementary material for: Association of modifiable risk factors with obstructive sleep apnea: a Mendelian randomization study
Source: publisher site journal article supplement (doi:10.18632/aging.205288), 2023-12-11
Supplement: Supplementary file [file aging-v15i23-205288-supplementary-material-SD1.pdf]

**SUPPLEMENTARY FIGURES**

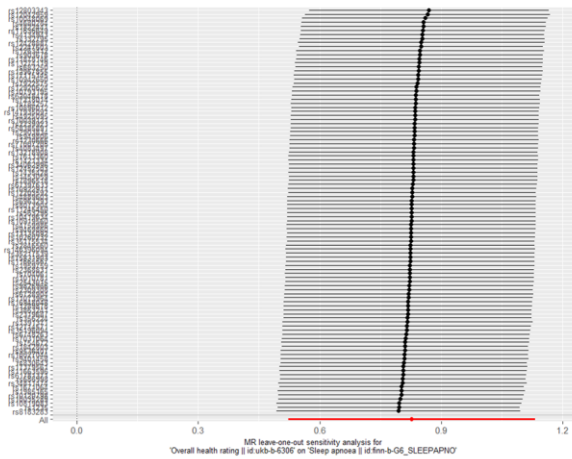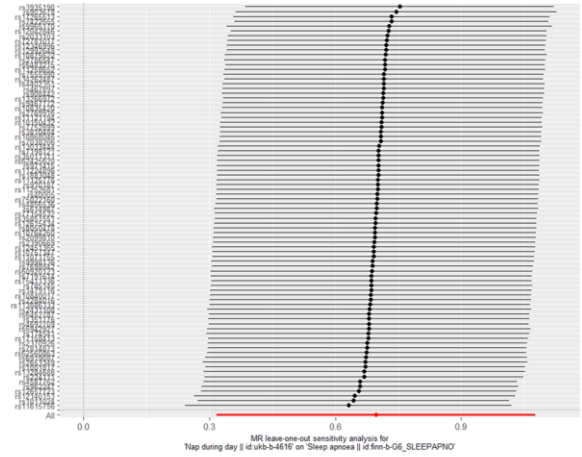

**Overall health rating**

**Nap during day**

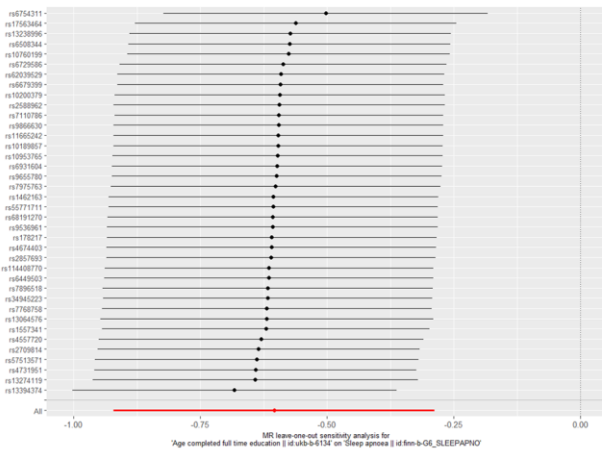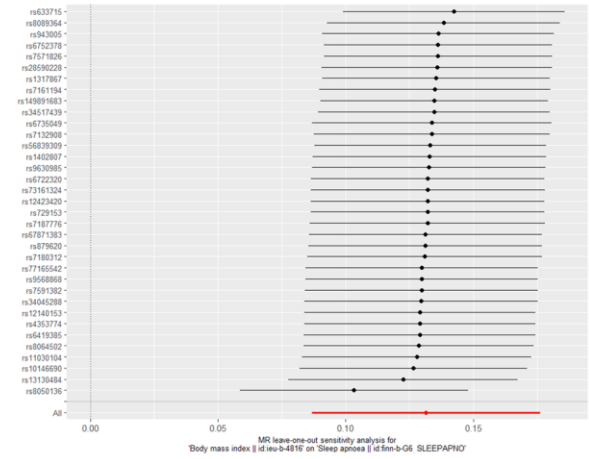

**Education level**

**BMI**

**Supplementary Figure 1. Leave-one-out analyses for SNPs associated with risk factors (overall health rating/nap during day/education level/BMI) on OSA.**

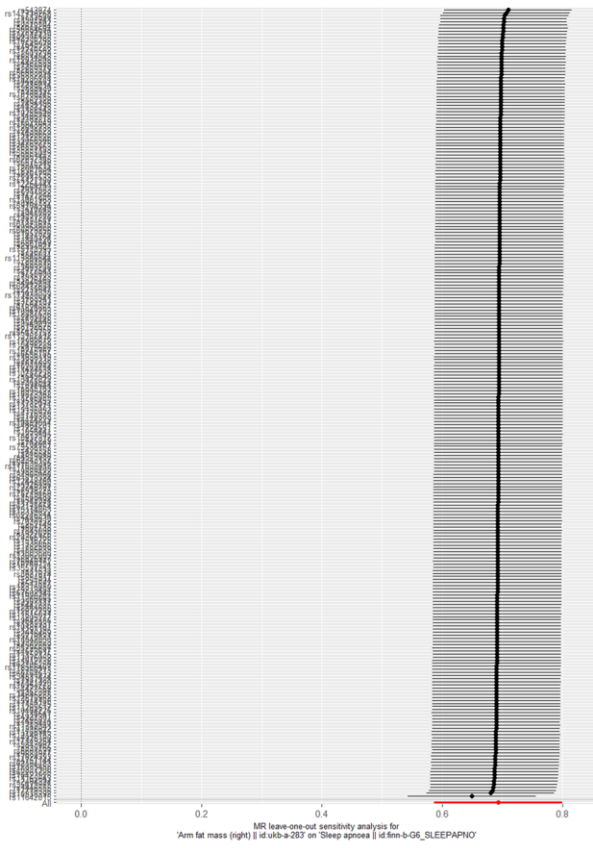

Arm fat mass (left)

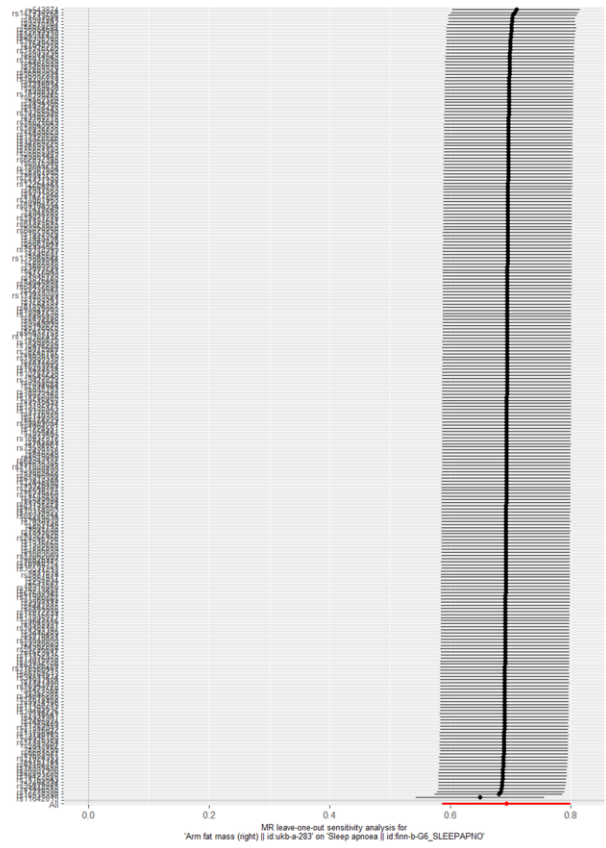

Arm fat mass (right)

Supplementary Figure 2. Leave-one-out analyses for SNPs associated with risk factors (arm fat mass left/right) on OSA.

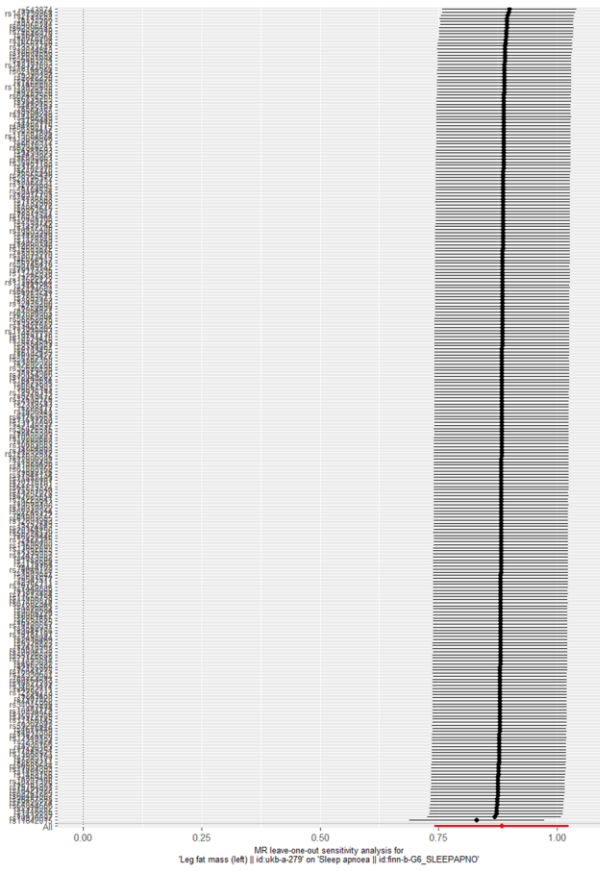

Leg fat mass (left)

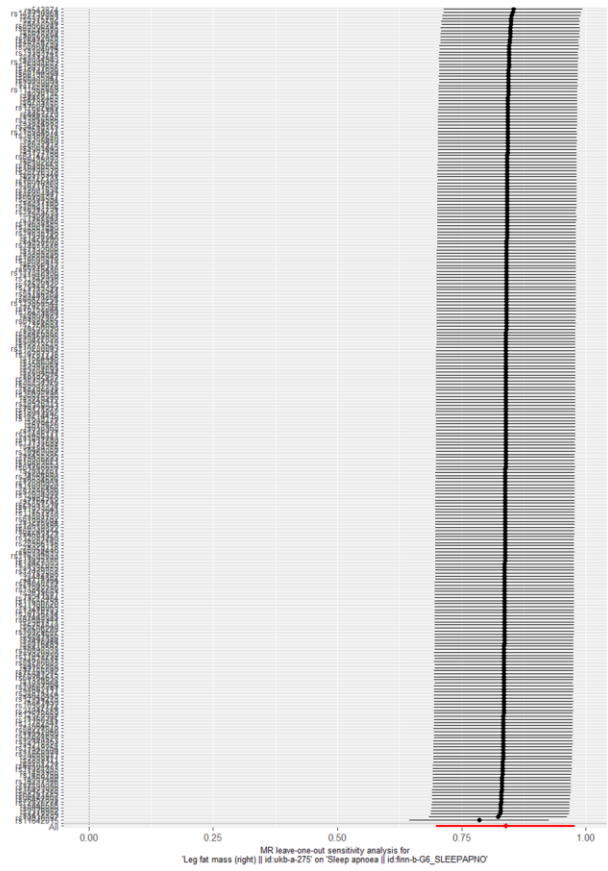

Leg fat mass (right)

**Supplementary Figure 3. Leave-one-out analyses for SNPs associated with risk factors (leg fat mass left/right) on OSA.**

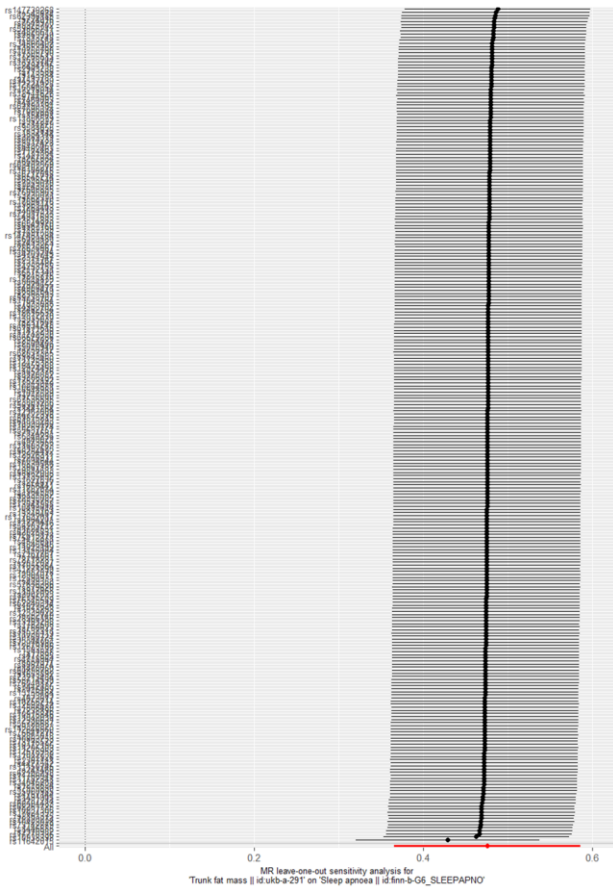

Trunk fat mass

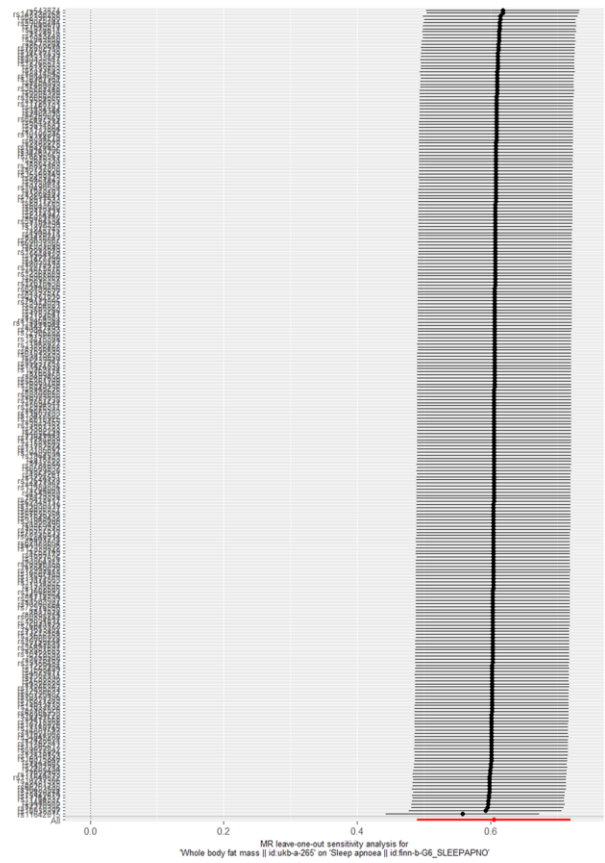

Whole body fat mass

**Supplementary Figure 4. Leave-one-out analyses for SNPs associated with risk factors (trunk fat mass/whole body fat mass) on OSA.**

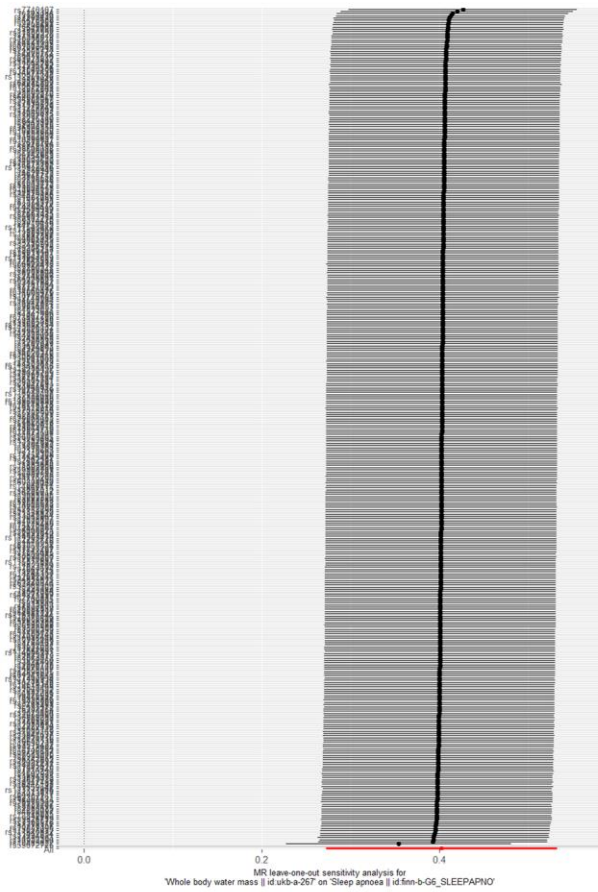

Whole body water mass

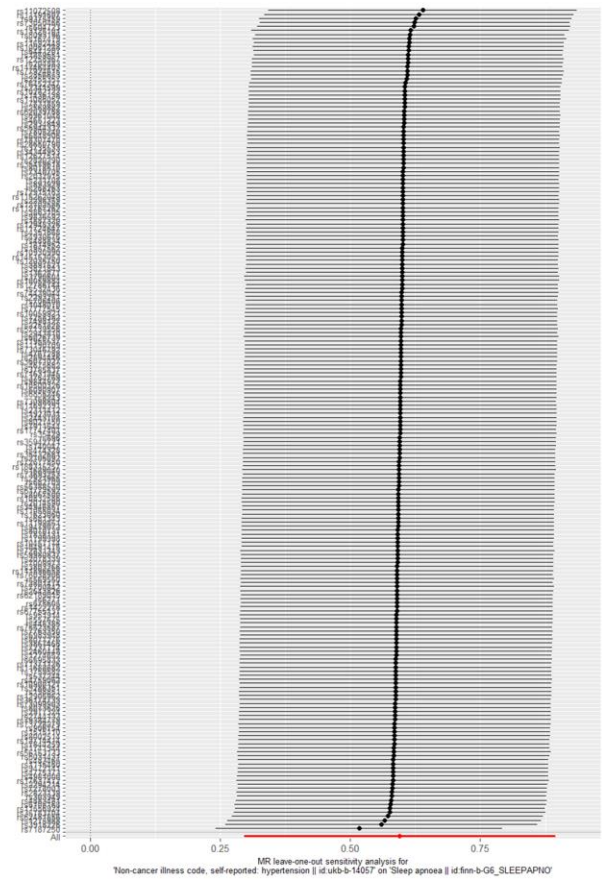

Hypertension

**Supplementary Figure 5. Leave-one-out analyses for SNPs associated with meaningful risk factors (whole body water mass/hypertension) on OSA.**
